# Supplementary material for: Dysregulated Prefrontal Cortex Inhibition in Prepubescent and Adolescent Fragile X Mouse Model
Source: Front Mol Neurosci. 2020 May 26;13:88. doi: 10.3389/fnmol.2020.00088 (PMC7264168; doi:10.3389/fnmol.2020.00088)
Supplement: Supplementary file 1 [file Table_1.xlsx]

## Sheet: Sheet1
Suppl. Table: 2way ANOVA and 2way Repeated Measures ANOVA statistics
Experiment	Age	Statistics	Effect: Genotype x	Genotype		Effect		Interaction		Subjects		Multiple Comparison
				% Variation	P Value	% Variation	P Value	% Variation	P Value	% Variation	P Value	Groups	Test	P Value
smIPSC Frequency	Prepuberty	2way ANOVA	Tetrodotoxin	4.374	0.1022	26.6	0.0002	6.532	0.0476	---	---	sIPSC:mIPSC	LSD	WT = 0.1547, KO < 0.0001
smIPSC Frequency	Adolescence	2way ANOVA	Tetrodotoxin	11.45	0.0044	21.94	0.0001	2.009	0.2172	---	---	sIPSC:mIPSC	LSD	WT = 0.0003, KO = 0.0519
smIPSC tau Fast	Prepuberty	2way ANOVA	Tetrodotoxin	13.99	0.016	12.01	0.0247	7.256	0.0762	---	---	Genotype, Tetrodotoxin	LSD	Genotype [sIPSC = 0.0042, mIPSC = 0.6188], Tetrodotoxin [WT = 0.7050, KO = 0.0070]
smIPSC tau Slow	Prepuberty	2way ANOVA	Tetrodotoxin	1.292	0.4958	7.266	0.1121	5.324	0.1716	---	---	---	---	---
smIPSC tau Weighted	Prepuberty	2way ANOVA	Tetrodotoxin	5.692	0.1448	10.58	0.0499	3.719	0.2358	---	---	sIPSC:mIPSC	LSD	WT = 0.5502, KO = 0.0326
smIPSC tau Fast	Adolescence	2way ANOVA	Tetrodotoxin	33.54	< 0.0001	0.8331	0.4516	2.285	0.2286	---	---	Genotype	LSD	sIPSC = 0.0001, mIPSC = 0.0210
smIPSC tau Slow	Adolescence	2way ANOVA	Tetrodotoxin	16.4	0.004	0.01724	0.9217	11.9	0.013	---	---	Genotype, Tetrodotoxin	LSD	Genotype [sIPSC = 0.0002, mIPSC = 0.7549], Tetrodotoxin [WT = 0.0790, KO = 0.0685]
smIPSC tau Weighted	Adolescence	2way ANOVA	Tetrodotoxin	29.41	0.0001	0.6547	0.535	1.367	0.3714	---	---	sIPSC:mIPSC	LSD	WT = 0.2767, KO = 0.8478
eIPSC tau Fast	Prepuberty	2way ANOVA	Stim. Frequency	19.96	0.0009	1.679	0.79	0.8385	0.9132	---	---	WT:KO	LSD	5Hz = 0.1932, 20Hz = 0.1322, 50Hz = 0.0161, 100Hz = 0.0716
eIPSC tau Slow	Prepuberty	2way ANOVA	Stim. Frequency	2.676	0.2501	1.57	0.8503	0.35	0.989	---	---	---	---	---
eIPSC tau Weighted	Prepuberty	2way ANOVA	Stim. Frequency	0.616	0.3678	3.154	0.6587	0.8272	0.9349	---	---	---	---	---
eIPSC, 1st Amplitude	Prepuberty	2way RM ANOVA	Stim. Frequency	0.2356	0.8339	0.03651	0.3805	0.01917	0.6516	99.04	< 0.0001	---	---	---
eIPSC, 1st Amplitude	Adolescence	2way RM ANOVA	Stim. Frequency	1.324	0.6691	0.11	0.3064	0.06052	0.5672	97.27	< 0.0001	---	---	---
eIPSC Plasticity, 5Hz	Prepuberty	2way RM ANOVA	Stim. Frequency	5.31	0.1563	28.36	< 0.0001	0.1876	0.9092	46.21	< 0.0001	---	---	---
eIPSC Plasticity, 20Hz	Prepuberty	2way RM ANOVA	Stim. Frequency	10.68	0.0403	34.14	< 0.0001	0.5557	0.4903	41.88	< 0.0001	WT:KO	LSD	Evoked Response: 2nd p = 0.2883, 3rd p = 0.0183, 4th p = 0.0408, 5th p = 0.0504
eIPSC Plasticity, 50Hz	Prepuberty	2way RM ANOVA	Stim. Frequency	13.35	0.0421	20.02	< 0.0001	0.4888	0.5459	53.44	< 0.0001	WT:KO	LSD	Evoked Response: 2nd p = 0.1545, 3rd p = 0.081, 4th p = 0.0282, 5th p = 0.0200
eIPSC Plasticity, 100Hz	Prepuberty	2way RM ANOVA	Stim. Frequency	5.328	0.1889	19.73	< 0.0001	1.133	0.357	54.51	< 0.0001	---	---	---
eIPSC Plasticity, 5Hz	Adolescence	2way RM ANOVA	Stim. Frequency	9.112	0.158	20.48	< 0.0001	1.163	0.2651	57.35	< 0.0001	---	---	---
eIPSC Plasticity, 20Hz	Adolescence	2way RM ANOVA	Stim. Frequency	6.237	0.2697	19.97	< 0.0001	0.622	0.3103	66.1	< 0.0001	---	---	---
eIPSC Plasticity, 50Hz	Adolescence	2way RM ANOVA	Stim. Frequency	3.631	0.3957	20.34	< 0.0001	1.018	0.1994	66.2	< 0.0001	---	---	---
eIPSC Plasticity, 100Hz	Adolescence	2way RM ANOVA	Stim. Frequency	0.5655	0.7455	19.04	< 0.0001	0.6099	0.5966	66.87	< 0.0001	---	---	---
uIPSC Plasticity, 5Hz	Prepuberty	2way RM ANOVA	Unitary Responses	0.265	0.8056	2.371	0.5147	0.7282	0.8691	54.59	0.0003	---	---	---
uIPSC Plasticity, 20Hz	Prepuberty	2way RM ANOVA	Unitary Responses	15.31	0.0306	16.82	< 0.0001	0.9459	0.6769	37.05	0.0001	WT:KO	LSD	Evoked Response: 2nd p = 0.1226, 3rd p = 0.0122, 4th p = 0.1706, 5th p = 0.0714
uIPSC Plasticity, 50Hz	Prepuberty	2way RM ANOVA	Unitary Responses	0.03736	0.9161	18.09	< 0.0001	0.3535	0.8501	55.61	< 0.0001	---	---	---
uIPSC Plasticity, 100Hz	Prepuberty	2way RM ANOVA	Unitary Responses	2.557	0.4071	27.62	< 0.0001	0.6185	0.7566	45.29	< 0.0001	---	---	---
eIPSC Release Probability	Prepuberty	2way RM ANOVA	Stim. Frequency	9.42	0.0575	15.2	0.0001	0.5361	0.8349	41.47	0.0001	---	---	---
eIPSC Release Probability	Adolescence	2way RM ANOVA	Stim. Frequency	0.5105	0.6174	14.83	0.0156	3.674	0.4207	27.39	0.1413	---	---	---
eIPSC Absolute Efficacy	Prepuberty	2way RM ANOVA	Stim. Frequency	2.338	0.4768	5.625	< 0.0001	0.6635	0.3902	79.69	< 0.0001	---	---	---
eIPSC Absolute Efficacy	Adolescence	2way RM ANOVA	Stim. Frequency	0.501	0.7173	11.32	0.0082	1.491	0.6254	51.26	0.0001	---	---	---
eIPSC Synaptic Recovery tau	Prepuberty	2way RM ANOVA	Stim. Frequency	0.00404	0.9701	20.68	< 0.0001	0.1118	0.9757	50.48	< 0.0001	---	---	---
eIPSC Synaptic Recovery tau	Adolescence	2way RM ANOVA	Stim. Frequency	0.06112	0.8776	41.52	< 0.0001	1.989	0.2915	34.78	< 0.0001	---	---	---
